# Supplementary material for: Efficient Model-Based Anthropometry under Clothing Using Low-Cost Depth Sensors
Source: MDPI journal article supplement (doi:10.3390/s24051350), 2024-02-20
Supplement: s1 [file s1]

## Supplementary Tables

**Table S1.** Descriptive statistics of anthropometric dimensions for Manual measurement and Predictions from the fitted Statistical Body Shape Models (SBSMs) on Laser scan with scan wear (SW) clothing (Unit: mm, sample size (n): 136)

| Methods     |      | Stature<br>without<br>Shoes | BMI<br>(Kg/m <sup>2</sup> ) | Erect<br>Sitting<br>Height | Acromial<br>Breadth | Buttock-<br>Knee<br>Length | Chest<br>Circumfe-<br>rence | Chest<br>Depth | Maximum<br>Hip<br>Breadth | Waist<br>Circumfe-<br>rence |
|-------------|------|-----------------------------|-----------------------------|----------------------------|---------------------|----------------------------|-----------------------------|----------------|---------------------------|-----------------------------|
| Manual      | Mean | 1689.5                      | 24.1                        | 898.4                      | 385.9               | 587.1                      | 935.7                       | 243.9          | 373.9                     | 845.4                       |
|             | SD   | 94.0                        | 2.7                         | 45.6                       | 29.6                | 34.0                       | 70.9                        | 20.0           | 24.1                      | 79.6                        |
|             | 5th  | 1550.3                      | 20.2                        | 821.2                      | 340.6               | 535.3                      | 820.0                       | 214.3          | 335.0                     | 724.3                       |
|             | 10th | 1564.1                      | 21.0                        | 842.1                      | 349.1               | 543.1                      | 849.1                       | 220.0          | 344.0                     | 735.5                       |
|             | 25th | 1606.5                      | 22.1                        | 864.5                      | 364.0               | 562.0                      | 890.0                       | 227.5          | 358.5                     | 795.5                       |
|             | 50th | 1690.0                      | 24.0                        | 893.0                      | 382.0               | 582.0                      | 928.0                       | 242.0          | 373.0                     | 842.5                       |
|             | 75th | 1758.5                      | 26.3                        | 932.0                      | 406.5               | 611.5                      | 986.0                       | 258.5          | 388.5                     | 890.5                       |
|             | 90th | 1823.9                      | 27.4                        | 962.7                      | 430.9               | 630.9                      | 1027.9                      | 270.0          | 406.8                     | 945.0                       |
|             | 95th | 1846.7                      | 29.0                        | 969.7                      | 439.1               | 652.0                      | 1050.3                      | 279.7          | 413.7                     | 971.4                       |
| Laser<br>SW | Mean | 1709.0                      | 23.8                        | 903.6                      | 382.6               | 597.6                      | 960.6                       | 235.2          | 339.0                     | 851.7                       |
|             | SD   | 93.2                        | 2.6                         | 43.9                       | 34.9                | 29.1                       | 72.1                        | 21.6           | 20.8                      | 81.7                        |
|             | 5th  | 1571.7                      | 19.6                        | 836.2                      | 332.1               | 547.7                      | 850.0                       | 201.5          | 306.3                     | 729.8                       |
|             | 10th | 1588.3                      | 20.9                        | 845.4                      | 339.0               | 558.9                      | 870.4                       | 207.2          | 312.2                     | 748.1                       |
|             | 25th | 1628.3                      | 22.0                        | 869.7                      | 352.4               | 576.1                      | 906.6                       | 219.1          | 325.6                     | 799.1                       |
|             | 50th | 1711.9                      | 23.7                        | 899.9                      | 378.1               | 595.2                      | 954.6                       | 233.3          | 336.9                     | 844.0                       |
|             | 75th | 1776.4                      | 25.6                        | 937.7                      | 415.2               | 618.5                      | 1017.4                      | 251.5          | 353.8                     | 910.3                       |
|             | 90th | 1848.4                      | 27.3                        | 958.3                      | 426.1               | 637.1                      | 1052.1                      | 263.7          | 362.7                     | 962.5                       |
|             | 95th | 1869.6                      | 28.3                        | 976.8                      | 436.2               | 644.7                      | 1068.3                      | 273.1          | 374.8                     | 983.9                       |

**Table S2.** Descriptive statistics of anthropometric dimensions for Manual measurement and Predictions from the Kinect-based system on Laser scan with scan wear (SW) clothing (Unit: mm, sample size (*n*): 129)

| Methods      |      | Stature<br>without<br>Shoes | BMI<br>(Kg/m <sup>2</sup> ) | Erect<br>Sitting<br>Height | Acromial<br>Breadth | Buttock-<br>Knee<br>Length | Chest<br>Circumfe-<br>rence | Chest<br>Depth | Maximum<br>Hip<br>Breadth | Waist<br>Circumfe-<br>rence |
|--------------|------|-----------------------------|-----------------------------|----------------------------|---------------------|----------------------------|-----------------------------|----------------|---------------------------|-----------------------------|
| Manual       | Mean | 1689.1                      | 24.3                        | 897.3                      | 385.9               | 588.2                      | 936.8                       | 244.4          | 373.8                     | 848.2                       |
|              | SD   | 88.5                        | 2.7                         | 42.7                       | 29.1                | 32.7                       | 68.6                        | 20.2           | 23.6                      | 78.2                        |
|              | 5th  | 1550.0                      | 20.2                        | 823.8                      | 341.8               | 538.0                      | 828.6                       | 215.0          | 334.9                     | 725.0                       |
|              | 10th | 1568.2                      | 21.0                        | 842.4                      | 349.4               | 549.0                      | 855.0                       | 220.0          | 344.0                     | 740.0                       |
|              | 25th | 1611.5                      | 22.2                        | 865.8                      | 364.8               | 562.0                      | 890.0                       | 228.0          | 360.0                     | 795.8                       |
|              | 50th | 1694.0                      | 24.3                        | 893.0                      | 382.0               | 582.0                      | 930.0                       | 243.0          | 373.0                     | 843.0                       |
|              | 75th | 1755.5                      | 26.2                        | 930.3                      | 406.0               | 613.3                      | 982.8                       | 257.0          | 389.3                     | 893.5                       |
|              | 90th | 1815.6                      | 27.7                        | 958.2                      | 427.4               | 630.0                      | 1025.4                      | 270.0          | 406.2                     | 952.2                       |
|              | 95th | 1834.3                      | 29.1                        | 969.0                      | 434.3               | 652.0                      | 1044.5                      | 283.0          | 411.1                     | 972.0                       |
| Kinect<br>SW | Mean | 1690.9                      | 23.6                        | 880.5                      | 385.3               | 603.5                      | 945.1                       | 230.9          | 342.1                     | 829.4                       |
|              | SD   | 88.1                        | 2.7                         | 42.8                       | 29.2                | 28.0                       | 70.6                        | 19.8           | 20.2                      | 77.9                        |
|              | 5th  | 1557.7                      | 19.5                        | 815.0                      | 341.0               | 558.4                      | 836.3                       | 198.9          | 305.3                     | 711.0                       |
|              | 10th | 1570.7                      | 20.2                        | 818.1                      | 347.1               | 567.5                      | 857.2                       | 207.6          | 316.7                     | 734.6                       |
|              | 25th | 1616.5                      | 21.5                        | 850.3                      | 359.7               | 583.1                      | 893.6                       | 216.7          | 328.3                     | 772.6                       |
|              | 50th | 1699.3                      | 23.4                        | 880.1                      | 383.0               | 601.4                      | 933.3                       | 229.5          | 341.8                     | 827.0                       |
|              | 75th | 1756.6                      | 25.5                        | 910.9                      | 409.5               | 625.4                      | 1004.1                      | 242.2          | 356.8                     | 882.2                       |
|              | 90th | 1813.2                      | 26.9                        | 934.5                      | 425.5               | 640.5                      | 1036.7                      | 257.4          | 366.8                     | 922.7                       |
|              | 95th | 1839.4                      | 28.8                        | 949.7                      | 429.3               | 651.7                      | 1065.1                      | 265.2          | 374.8                     | 949.3                       |

**Table S3.** Descriptive statistics of anthropometric dimensions for Manual measurement and Predictions from the Kinect-based system on Laser scan with physical training (PT) clothing (Unit: mm, sample size (*n*): 127).

|              |      | Stature | BMI                  | Erect   | Acromial | Buttock- | Chest     | Chest | Maximum | Waist     |
|--------------|------|---------|----------------------|---------|----------|----------|-----------|-------|---------|-----------|
| Methods      |      | without | (Kg/m <sup>2</sup> ) | Sitting | Breadth  | Knee     | Circumfe- | Depth | Hip     | Circumfe- |
|              |      | Shoes   |                      | Height  |          | Length   | rence     |       | Breadth | rence     |
| Manual       | Mean | 1688.5  | 24.3                 | 897.2   | 385.8    | 588.1    | 938.2     | 245.4 | 374.1   | 847.4     |
|              | SD   | 89.7    | 2.7                  | 44.8    | 29.0     | 32.9     | 70.1      | 20.4  | 24.2    | 80.7      |
|              | 5th  | 1549.9  | 20.4                 | 820.0   | 341.7    | 536.9    | 819.9     | 214.6 | 336.7   | 722.8     |
|              | 10th | 1575.2  | 21.0                 | 842.2   | 349.2    | 544.2    | 855.0     | 220.2 | 344.0   | 742.0     |
|              | 25th | 1613.5  | 22.3                 | 864.0   | 365.0    | 564.3    | 891.3     | 229.3 | 358.3   | 795.0     |
|              | 50th | 1692.0  | 24.5                 | 892.0   | 382.0    | 586.0    | 934.0     | 245.0 | 372.0   | 843.0     |
|              | 75th | 1752.3  | 26.2                 | 929.5   | 405.0    | 613.0    | 977.8     | 260.8 | 388.0   | 896.5     |
|              | 90th | 1816.8  | 27.6                 | 959.6   | 429.8    | 630.8    | 1031.2    | 270.0 | 407.0   | 947.4     |
|              | 95th | 1834.9  | 29.1                 | 969.0   | 434.5    | 652.0    | 1054.8    | 283.0 | 416.2   | 970.3     |
| Kinect<br>PT | Mean | 1695.0  | 23.1                 | 885.8   | 387.5    | 593.9    | 975.5     | 235.1 | 340.7   | 880.6     |
|              | SD   | 88.3    | 4.2                  | 42.0    | 34.2     | 32.2     | 92.4      | 28.2  | 26.5    | 97.6      |
|              | 5th  | 1556.6  | 19.6                 | 819.8   | 335.4    | 550.1    | 875.2     | 203.3 | 304.5   | 767.8     |
|              | 10th | 1583.0  | 20.1                 | 834.1   | 345.9    | 557.0    | 888.8     | 211.2 | 316.4   | 790.1     |
|              | 25th | 1618.9  | 21.6                 | 853.1   | 358.6    | 578.1    | 925.9     | 222.4 | 328.4   | 832.4     |
|              | 50th | 1698.3  | 23.3                 | 884.9   | 381.6    | 598.3    | 977.0     | 235.2 | 340.2   | 883.3     |
|              | 75th | 1756.6  | 25.1                 | 913.2   | 417.8    | 614.2    | 1032.3    | 250.1 | 355.7   | 943.3     |
|              | 90th | 1821.6  | 26.3                 | 947.1   | 431.7    | 627.1    | 1067.5    | 263.7 | 366.2   | 984.1     |
|              | 95th | 1844.5  | 27.8                 | 958.0   | 438.0    | 638.5    | 1091.1    | 273.7 | 375.8   | 995.5     |

**Table S4.** Comparison of mean bias and limits of agreement (LoA, mm) among three methods (Laser SW, Kinect SW, Kinect PT) for body dimensions (Unit: mm)

| Dimensions               | Manual |      | Manual vs. Laser SW |                        | Manual vs. Kinect SW |                        | Manual vs. Kinect PT |                        |
|--------------------------|--------|------|---------------------|------------------------|----------------------|------------------------|----------------------|------------------------|
|                          | Mean   | SD   | Bias                | LoA (% of mean manual) | Bias                 | LoA (% of mean manual) | Bias                 | LoA (% of mean manual) |
| Stature w/o shoes        | 1691.4 | 91.8 | 19.5                | ±18.0 (1.1%)           | 1.1                  | ±31.9 (1.9%)           | 6.6                  | ±12.4 (0.7%)           |
| Cervicale Height         | 1460.5 | 83.3 | 4.7                 | ±26.5 (1.8%)           | -4.4                 | ±34.6 (2.4%)           | -1.0                 | ±25.0 (1.7%)           |
| Chest Height             | 1250.4 | 77.1 | -12.2               | ±41.1 (3.3%)           | -19.6                | ±42.8 (3.4%)           | -21.0                | ±46.9 (3.8%)           |
| Weight w/o shoes(Kg)     | 69.6   | 11.6 | 0.8                 | ±3.8 (5.5%)            | -1.6                 | ±5.3 (7.6%)            | -2.7                 | ±19.8 (28.5%)          |
| Erect Sitting Height     | 898.8  | 44.3 | 5.3                 | ±26.1 (2.9%)           | -17.5                | ±37.5 (4.2%)           | -11.1                | ±37.5 (4.2%)           |
| Eye Height (Sitting)     | 789.8  | 42.2 | 1.5                 | ±36.9 (4.7%)           | -16.7                | ±41.5 (5.3%)           | -12.0                | ±39.9 (5.1%)           |
| Knee Height              | 515.4  | 33.2 | 21.3                | ±22.0 (4.3%)           | 21.4                 | ±26.6 (5.2%)           | 20.0                 | ±27.8 (5.4%)           |
| Popliteal Height         | 419.0  | 32.5 | -10.1               | ±35.5 (8.5%)           | -5.4                 | ±34.7 (8.3%)           | -2.2                 | ±36.0 (8.6%)           |
| Head Length              | 192.8  | 8.4  | 8.1                 | ±11.1 (5.7%)           | 0.4                  | ±15.5 (8.0%)           | 1.1                  | ±19.2 (9.9%)           |
| Head Breadth             | 154.6  | 6.6  | -4.9                | ±9.0 (5.8%)            | -10.3                | ±13.6 (8.8%)           | -9.4                 | ±15.9 (10.3%)          |
| Tragion to Top of Head   | 125.5  | 8.0  | 5.6                 | ±14.6 (11.6%)          | 1.04                 | ±17.3 (13.8%)          | 3.1                  | ±16.2 (12.9%)          |
| Buttock-Knee Length      | 588.3  | 33.5 | 10.4                | ±25.6 (4.3%)           | 15.3                 | ±25.9 (4.4%)           | 5.5                  | ±47.0 (8.0%)           |
| Buttock-Popliteal Length | 483.6  | 30.4 | 1.9                 | ±31.7 (6.6%)           | 9.4                  | ±32.3 (6.7%)           | 2.3                  | ±42.6 (8.8%)           |
| Acromial Breadth         | 386.7  | 29.1 | -3.4                | ±36.6 (9.5%)           | -0.7                 | ±35.5 (9.2%)           | 1.2                  | ±43.2 (11.2%)          |
| Chest Breadth            | 281.5  | 25.8 | -12.5               | ±38.1 (13.5%)          | -13.7                | ±38.5 (13.7%)          | -1.7                 | ±41.1 (14.6%)          |
| Chest Depth (scapula)    | 244.2  | 20.0 | -8.7                | ±18.2 (7.5%)           | -13.7                | ±20.0 (8.2%)           | -10.5                | ±45.7 (18.7%)          |
| Bi-Cristal Breadth       | 296.1  | 25.2 | -30.7               | ±33.3 (11.3%)          | -34.3                | ±38.6 (13.0%)          | -21.9                | ±42.8 (14.4%)          |
| Upper Arm Length         | 355.4  | 23.8 | -4.2                | ±20.7 (5.8%)           | -7.4                 | ±26.2 (7.4%)           | -5.0                 | ±24.9 (7.0%)           |
| Lower Arm Length         | 460.6  | 35.1 | -7.2                | ±47.1 (10.2%)          | -12.8                | ±48.8 (10.6%)          | -13.7                | ±31.8 (6.9%)           |
| Hand Length              | 186.5  | 11.8 | -1.2                | ±18.3 (9.8%)           | -6.1                 | ±19.8 (10.6%)          | -5.9                 | ±17.9 (9.6%)           |
| Hand Breadth             | 79.1   | 5.8  | 2.9                 | ±7.9 (10.0%)           | 1.4                  | ±11.4 (14.4%)          | 0.1                  | ±11.0 (14.0%)          |

| Dimensions                 | Manual |      | Manual vs. Laser SW |                        | Manual vs. Kinect SW |                        | Manual vs. Kinect PT |                        |
|----------------------------|--------|------|---------------------|------------------------|----------------------|------------------------|----------------------|------------------------|
|                            | Mean   | SD   | Bias                | LoA (% of mean manual) | Bias                 | LoA (% of mean manual) | Bias                 | LoA (% of mean manual) |
| Acromion-Radiale Length    | 317.7  | 21.4 | 4.5                 | ±19.1 (6.0%)           | 4.5                  | ±22.6 (7.1%)           | 6.7                  | ±22.7 (7.1%)           |
| Radiale-Styilion Length    | 246.8  | 19.9 | 5.7                 | ±31.4 (12.7%)          | 4.3                  | ±24.1 (9.7%)           | 1.4                  | ±26.2 (10.6%)          |
| Thigh Length               | 431.7  | 29.8 | -24.2               | ±48.3 (11.2%)          | -24.0                | ±44.6 (10.3%)          | -31.9                | ±45.0 (10.4%)          |
| Shank Length               | 367.5  | 32.4 | 41.3                | ±43.1 (11.7%)          | 45.8                 | ±44.3 (12.0%)          | 48.9                 | ±44.5 (12.1%)          |
| Chest Circumference        | 937.2  | 68.8 | 24.9                | ±44.8 (4.8%)           | 8.3                  | ±58.1 (6.2%)           | 36.2                 | ±130.5 (13.9%)         |
| Waist Circumference (omph) | 847.7  | 78.5 | 5.9                 | ±53.2 (6.3%)           | -18.5                | ±65.4 (7.7%)           | 32.9                 | ±158.8 (18.7%)         |
| Waist Circumference Height | 1012.9 | 64.8 | 22.6                | ±42.1 (4.2%)           | 12.1                 | ±40.6 (4.0%)           | 7.3                  | ±43.5 (4.3%)           |
| Hip Circumference          | 984.4  | 58.1 | 9.4                 | ±32.7 (3.3%)           | 21.8                 | ±35.8 (3.6%)           | 13.3                 | ±127.4 (12.9%)         |
